# Supplementary material
Source: publisher figshare collection journal article supplement (https://tandf.figshare.com/ndownloader/files/13457597)
Supplement: Supplementary file 1 [file 13457597]

**Supplemental files**

**Molecular dynamics simulations provide insights into** **the origin of Gleevec’s selectivity toward human tyrosine kinases**

Lulu Wang1§, Guodong Zheng2§, Xianxian Liu3, Duan Ni4, Xinheng He4, Jinying Cheng3*, Shaoyong Lu4*

1Department of Critical Care Medicine, Binzhou Medical University Hospital, Binzhou, 256603, Shandong, China

2Department of VIP Clinic, Changhai Hospital, Second Military Medical University,

Shanghai, 200433, China

3Department of Infectious Diseases, Binzhou Medical University Hospital, Binzhou, 256603, Shandong, China

4Department of Pathophysiology, Key Laboratory of Cell Differentiation and Apoptosis of Chinese Ministry of Education, Shanghai Jiao Tong University, School of Medicine, Shanghai, 200025, China

**§**The authors contributed equally

*** To whom correspondence should be addressed**

Dr. Jinying Chen

Email: chengjin_ying@126.com

Prof. Shaoyong Lu

Email: lushaoyong@yeah.net


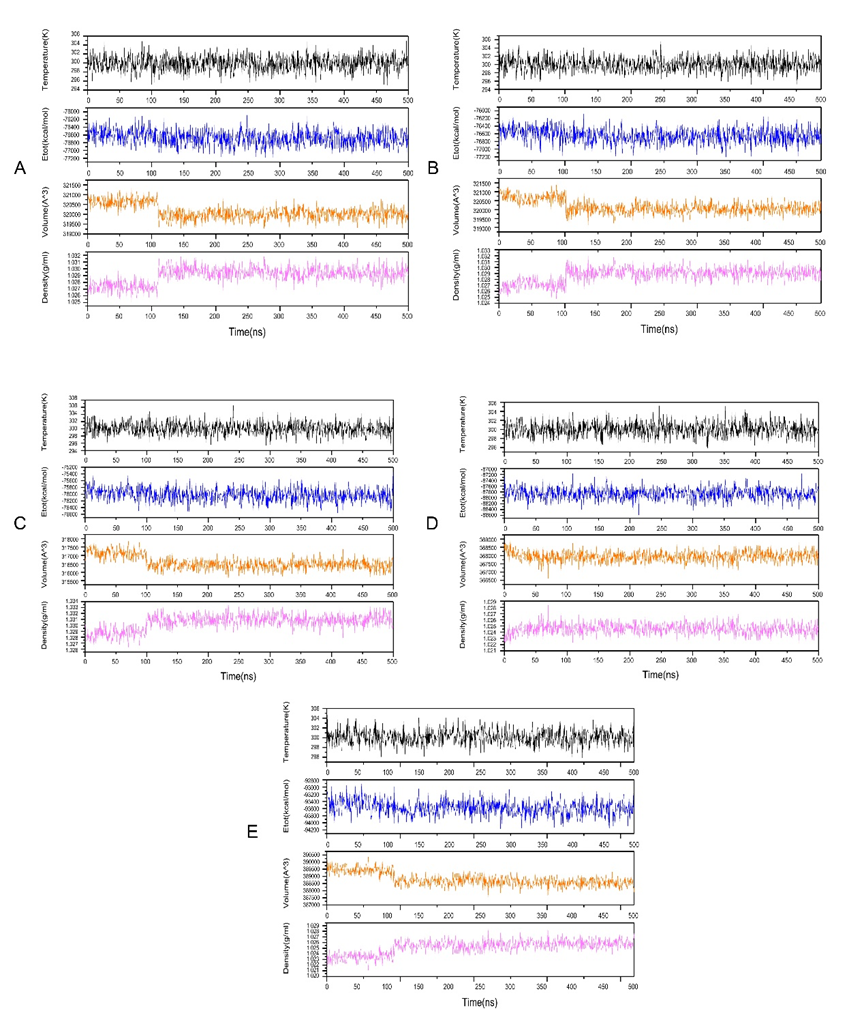


**Figure S1: The values of temperature, Etot, volume and mass density against the time of simulation.**

The values of temperature, Etot, volume and mass density of 4CSV (A), 4CSV-SRC (B), 4CSV-ABL (C), SRC (D), and ABL (E) complexes were plotted against the time of simulation.


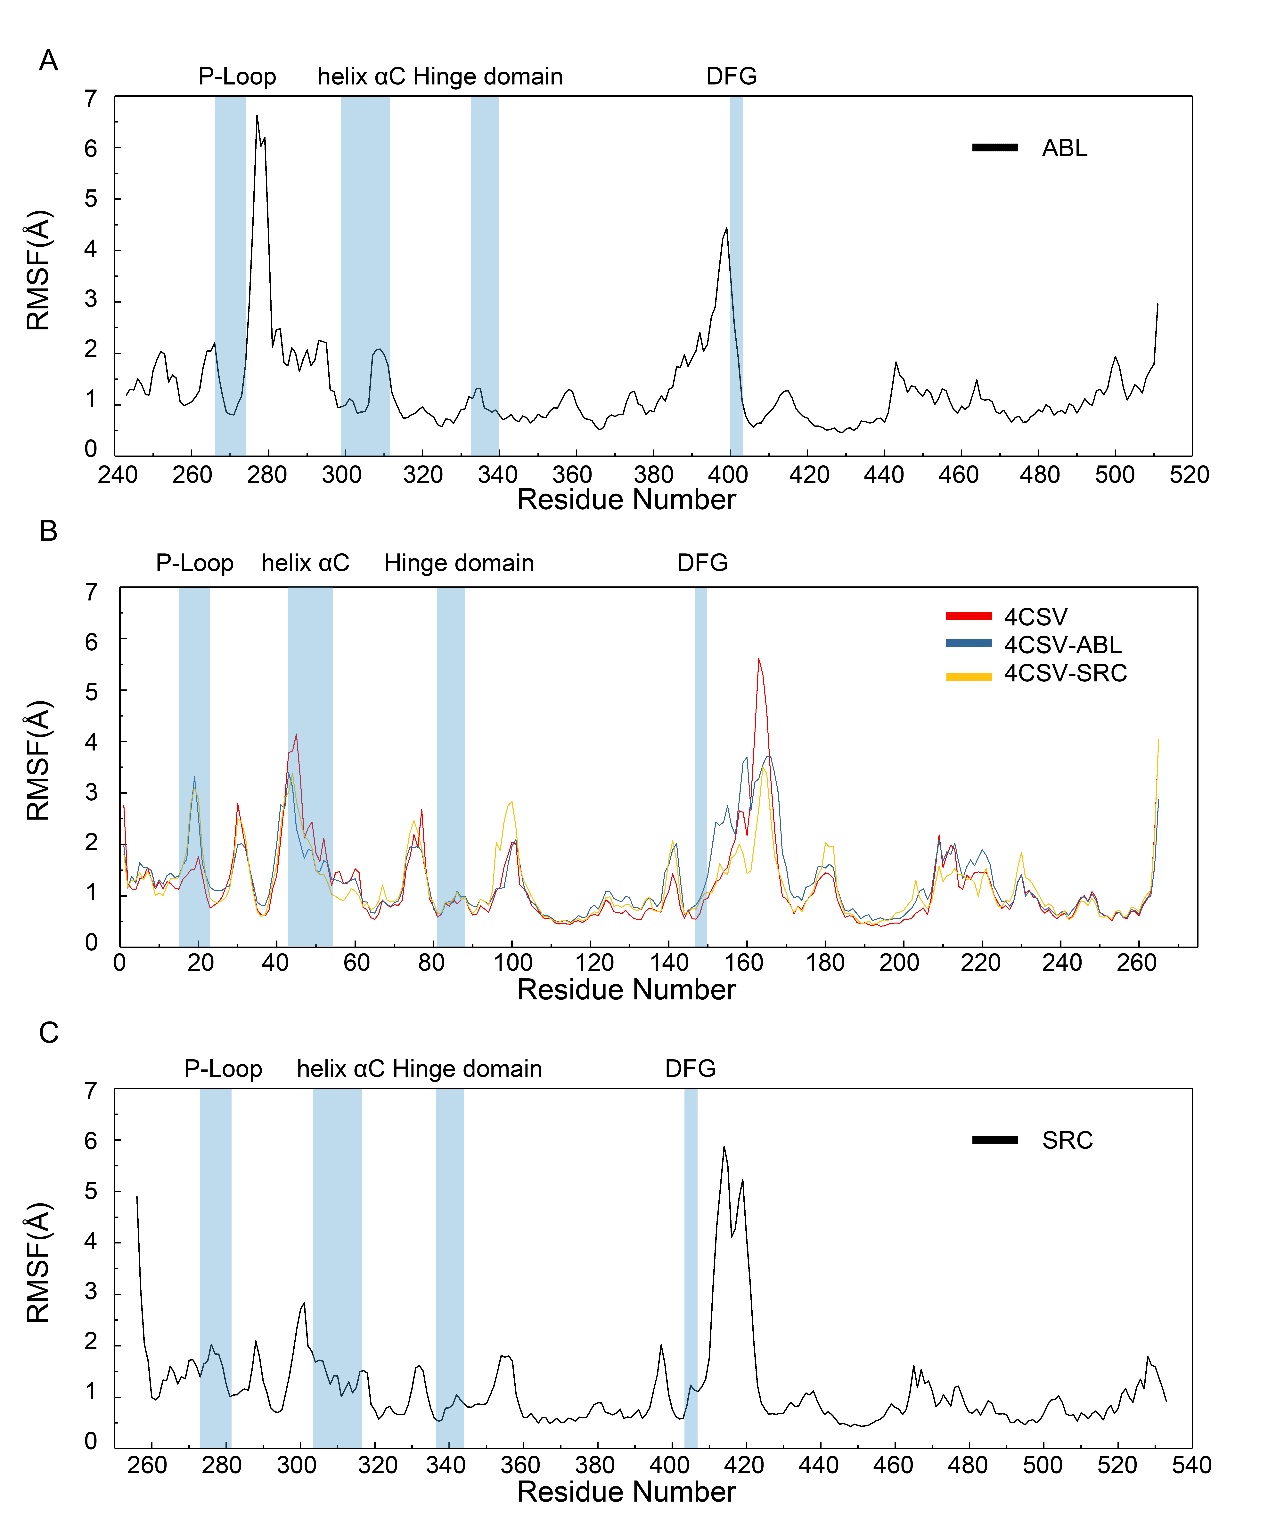


**Figure S2: The RMSF values with highlighted special residues interacting with Gleeve against the residues numbers.**

(A) The RMSF values of ABL complex were plotted against residue numbers. (B) The RMSF values of 4CSV, 4CSV-ABL and 4CSV-SRC complexes were plotted in different colors against residue numbers. (C) The RMSF values of SRC complex were plotted against residue numbers.
